# Supplementary material for: N6-methyladenosine of HIV-1 RNA regulates viral infection and HIV-1 Gag protein expression
Source: eLife journal article supplement (doi:10.7554/elife.15528), 2016-07-02
Supplement: supp [file elife-15528-supp-v1.zip]

Archive with 6 entries (6 files):
- elife_poa_e15528_Figure_1_figure_supplement_1.pdf
- elife_poa_e15528_Revised_article_with_tracked_changes.docx
- elife_poa_e15528_Figure_1_figure_supplement_3.pdf
- elife_poa_e15528_Figure_1_figure_supplement_4.pdf
- elife_poa_e15528_Figure_1_figure_supplement_2.pdf
- elife_poa_e15528_Figure_4_figure_supplement_1.pdf
