# Supplementary material for: N6-methyladenosine of HIV-1 RNA regulates viral infection and HIV-1 Gag protein expression
Source: eLife journal article supplement (doi:10.7554/elife.15528), 2016-07-02

**A****Un-infected Jurkat cells**

■ 3' UTR ■ CDS ■ 5' UTR ■ Noncoding

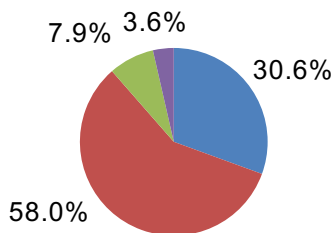**HIV-1 Infected Jurkat cells**

■ 3' UTR ■ CDS ■ 5' UTR ■ Noncoding

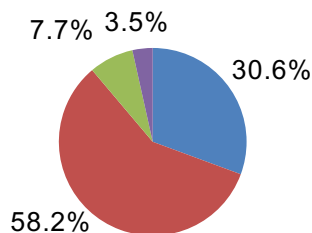**B****Un-infected primary CD4<sup>+</sup> T-cells**

■ 3' UTR ■ CDS ■ 5' UTR ■ Noncoding

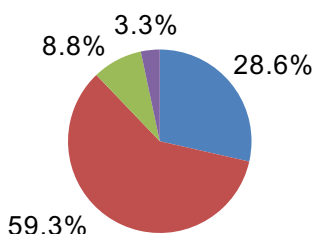**HIV-1 infected primary CD4<sup>+</sup> T-cells**

■ 3' UTR ■ CDS ■ 5' UTR ■ Noncoding

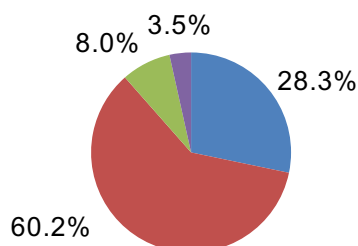**C**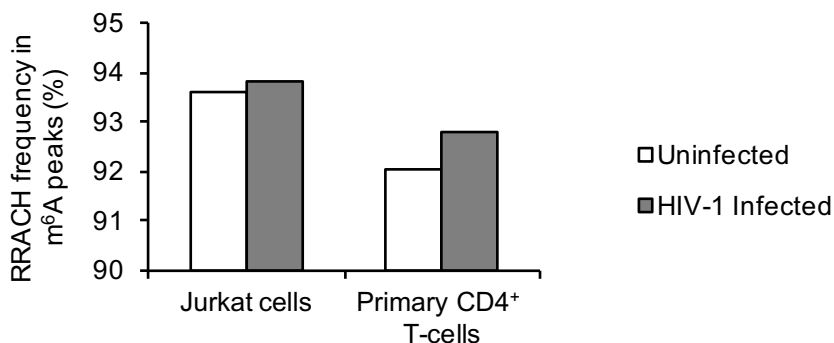**D**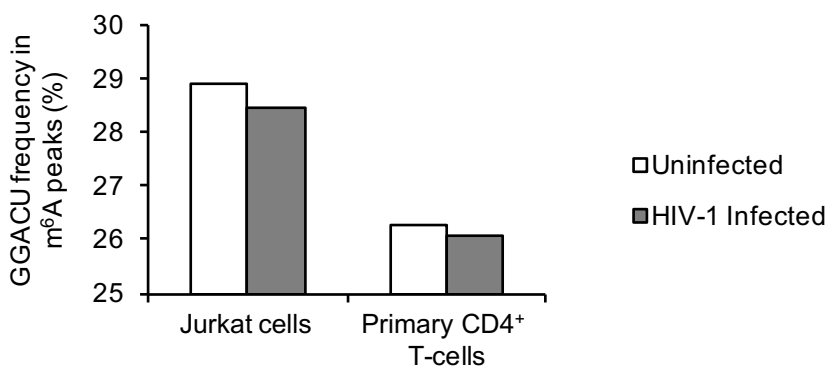

Supplement: supp [file elife-15528-supp-v1.zip › elife_poa_e15528_Figure_1_figure_supplement_3.pdf]
