# Supplementary material for: N6-methyladenosine of HIV-1 RNA regulates viral infection and HIV-1 Gag protein expression
Source: eLife journal article supplement (doi:10.7554/elife.15528), 2016-07-02
Supplement: supp [file elife_poa_e15528_Revised_article_with_tracked_changes.docx]

***N*6-methyladenosine of HIV-1 RNA regulates viral infection and HIV-1 Gag protein expression**

Nagaraja Tirumuru1, #, Boxuan Simen Zhao2, 3, #, Wuxun Lu1, Zhike Lu2, 3, Chuan He2, 3, *,

Li Wu1, 4, 5, *

1 Center for Retrovirus Research, Department of Veterinary Biosciences, 4 Department of Microbial Infection and Immunity, and 5 Comprehensive Cancer Center, The Ohio State University, Columbus, Ohio 43210, USA.

2 Department of Chemistry, Department of Biochemistry and Molecular Biology, Institute for Biophysical Dynamics, The University of Chicago, Chicago, Illinois 60637, USA; 3 Howard Hughes Medical Institute, The University of Chicago, Chicago, Illinois 60637, USA.

# These authors contributed equally.

* **Corresponding authors**

LW: [wu.840@osu.edu](mailto:wu.840@osu.edu), Phone: (614)-292-5408

CH: [chuanhe@uchicago.edu](mailto:chuanhe@uchicago.edu), Phone: (773)-702-5061

**Competing interests statement**: The authors declare that no competing interests exist.

**Abstract**

The internal *N*6-methyladenosine (m6A) methylation of eukaryotic nuclear RNA controls post-transcriptional gene expression, which is regulated by methyltransferases (writers), demethylases (erasers), and m6A-binding proteins (readers) in cells. The YTH domain family proteins (YTHDF1–3) bind to m6A-modified cellular RNAs and affect RNA metabolism and processing. Here we show that YTHDF1–3 proteins recognize m6A-modified HIV-1 RNA and inhibit HIV-1 infection in cell lines and primary CD4+ T-cells. We further mapped the YTHDF1–3 binding sites in HIV-1 RNA from infected cells. We found that overexpression of YTHDF proteins in cells inhibited HIV-1 infection mainly by decreasing HIV-1 reverse transcription, while knockdown of YTHDF1–3 in cells had the opposite effects. Moreover, silencing the m6A writers decreased HIV-1 Gag protein expression in virus-producer cells, while silencing the m6A erasers increased Gag expression. Our findings suggest an important role of m6A modification of HIV-1 RNA in viral infection and HIV-1 protein synthesis.

**Introduction**

Interactions of host proteins with HIV-1 substantially modulate viral replication and pathogenesis (Goff, 2007; Moir et al., 2011). Host proteins that interact with HIV-1 nucleic acids or viral proteins can either enhance or inhibit viral replication in cells. The secondary structure model of HIV-1 RNA and its interactions with viral proteins have been recently analyzed (Kutluay et al., 2014; Lavender et al., 2015; Watts et al., 2009; Wilkinson et al., 2008); however, it is less clear whether host proteins can post-transcriptionally modify HIV-1 RNA, which may affect interactions between RNA and host or viral proteins, thereby affecting HIV-1 infection.

*N*6-methyladenosine (m6A) is the most prevalent internal messenger RNA (mRNA) modification in eukaryotic organisms and plays pivotal roles in post-transcriptional regulation of gene expression (Fu et al., 2014; Jia et al., 2013; Yue et al., 2015). This methylation is reversible (Jia et al., 2011; Zheng et al., 2013) and is specifically recognized by a family of reader proteins (Liu et al., 2014; Wang et al., 2015). The m6A modification is widely distributed in mammalian mRNAs, enriched in the 3’ untranslated region (UTR) near the stop codon and also present in the 5’ UTR and long exons (Dominissini et al., 2012; Meyer et al., 2012; Zhou et al., 2015). It has been known for almost 40 years that RNAs of influenza virus, adenovirus, Rous sarcoma virus, and simian virus 40 are m6A-methylated (Beemon and Keith, 1977; Canaani et al., 1979; Hashimoto and Green, 1976; Krug et al., 1976), although the impact of the m6A modification on viral replication remains unclear. Recent studies revealed that the m6A modification of HIV-1 RNA significantly affects viral replication and gene expression (Kennedy et al., 2016; Lichinchi et al., 2016). Lichinchi *et al*. reported that HIV-1 mRNA contains multiple m6A modifications and viral infection in a CD4+ T-cell line increases the m6A levels in both host and viral mRNAs (Lichinchi et al., 2016), suggesting a dynamic regulation of m6A methylomes during HIV-1 infection. In contrast, Kennedy *et al.* only found four clusters of m6A modifications in the 3’ UTR region of the HIV-1 RNA genome that enhance viral gene expression (Kennedy et al., 2016).

The dynamic addition, removal, and recognition of m6A in cellular mRNAs and other types of nuclear RNAs are coordinately regulated by three groups of host proteins, including adenosine methyltransferases (writers), m6A demethylases (erasers), and m6A-selective-binding proteins (readers) (Fu et al., 2014). The methyltransferase complex is composed of METTL3, METTL14 and WTAP (Wilms’ tumor 1-associating protein), which add m6A modification to nuclear RNAs (Liu et al., 2014; Ping et al., 2014). The RNA demethylases FTO (fat mass and obesity-associated protein) and AlkBH5 (AlkB family member 5) remove m6A modification of RNAs (Fu et al., 2014; Jia et al., 2011). Three host proteins, including YTHDF1, 2, and 3 (YTHDF1–3), have been identified as selective m6A-binding proteins (readers) in mammalian cells (Dominissini et al., 2012; Wang et al., 2014; Wang et al., 2015). These m6A-reader proteins preferentially bind methylated mRNAs and control the stability and translation of target mRNAs (Dominissini et al., 2012; Liu et al., 2014). Human YTHDF1–3 proteins contain a conserved YTH RNA-binding domain that preferentially binds the m6A-containing RNAs and a P/Q/N-rich region that is associated with different RNA-protein complexes (Fu et al., 2014). Lichinchi *et al*. recently reported that silencing of the m6A writers or the eraser AlkBH5 decreases or increases HIV-1 replication, respectively (Lichinchi et al., 2016). Kennedy *et al.* showed that m6A modifications in the 3’ UTR region of HIV-1 RNA enhance viral gene expression by recruiting cellular YTHDF proteins (Kennedy et al., 2016). However, neither study examined m6A modification of HIV-1 RNA and its effect on HIV-1 replication in primary CD4+ T-cells, nor systemically analyzed the role of the m6A writers, erasers, and readers in HIV-1 replication.

Here we show that HIV-1 RNA contains multiple m6A modifications enriched in the 5' and 3' UTRs and within several coding genes. We mapped the specific sites in HIV-1 RNA bound by YTHDF proteins in HIV-1-infected cells. We found that overexpression of YTHDF proteins in target cells significantly inhibited HIV-1 infection, while knockdown of these proteins in primary CD4+ T-cells enhanced HIV-1 infection. Furthermore, knockdown of the m6A writers or the erasers decreased or increased HIV-1 Gag synthesis and virion release in virus producer cells, respectively. Our findings suggest important functions of the m6A reader, writer, and eraser proteins in modulating HIV-1 gene expression and viral infection through the m6A modification of HIV-1 RNA.

**Results**

**HIV-1 RNA genome contains m6A modifications.** To investigate the presence of m6A in HIV-1 RNA and to map the m6A modification within HIV-1 RNA, we isolated RNA samples from CD4+ Jurkat T-cells or primary CD4+ T-cells infected with replication-competent HIV-1NL4-3, and performed immunoprecipitation (IP) with poly(A)-enriched RNA using m6A-specific antibodies, followed by high-throughput RNA sequencing (m6A-seq) (Dominissini et al., 2012). We identified similar profiles of m6A peaks in HIV-1 RNA from these two cell types, which are mainly enriched in the 5' and 3' UTRs as well as the *rev* and *gag* genes of the HIV-1 genome (Figure 1A, 1B). To confirm m6A modification of HIV-1 RNA from virus producer cells, we transfected HEK293T cells with a plasmid containing full-length HIV-1 proviral DNA (pNL4-3) and extracted total RNA from the transfected cells. Using the same m6A-seq approach, we identified multiple m6A peaks in HIV-1 RNA, which are enriched in the 5' and 3' UTRs and within overlapped HIV-1 coding genes, such as *tat, rev, env,* and *nef* (Figure 1–figure supplement 1). These results confirm the m6A modification of HIV-1 RNA despite some differences in m6A distributions in HIV-1 infected CD4+ T-cells compared to transfected HEK293T cells.

To investigate whether HIV-1 virion RNA contains m6A, we isolated HIV-1 RNA from highly purified HIV-1 virions derived from infected CD4+ T-cells (Rossio et al., 1998; Wang et al., 2008), and then performed a quantitative analysis of m6A level using liquid chromatography-mass spectrometry (Jia et al., 2011). Our data showed that m6A in HIV-1 RNA was approximately 0.1% of total adenosines (Figure 1–figure supplement 2). Considering 35.8% of HIV-1 genomic RNA (gRNA) (9,173 nucleotides) are adenosines (van Hemert et al., 2014), our data suggest approximately 3-4 sites of the m6A modification in each copy of HIV-1 gRNA, which match the numbers of m6A peaks identified by m6A-seq (Figure 1A, 1B and Figure 1–figure supplement 1). Together, these results confirm that HIV-1 RNA contains m6A modifications at multiple sites within the viral genome.

**Distribution of m6A in the cellular RNAs and gene ontology (GO) analysis of m6A-modified cellular genes.** To examine the effect of HIV-1 infection on m6A modifications of cellular RNAs, we compared the distribution of m6A peaks in cellular RNAs from HIV-1 infected and uninfected T-cells. In Jurkat and primary CD4+ T-cells, HIV-1 infection did not significantly affect the percentages of total m6A peaks mapped to the human genome in the 5′ UTR, coding DNA sequence (CDS), 3′ UTR and noncoding regions (Figure 1–figure supplement 3A, B). The biological effects of the slightly altered m6A topology (< 1%) remain to be investigated. To determine whether the preferential m6A motif usage in the host cells was altered by HIV-1 infection, we performed consensus sequence analyses within the m6A peaks to determine the preferred motifs in cellular RNAs. HIV-1 infection of Jurkat cells or primary CD4+ T cells slightly increased the frequency of the RRACH motif within the m6A peaks by 0.2-0.8%, but slightly decreased the GGACU motif frequency by 0.2-0.4% (Figure 1–figure supplement 3C, D). These data suggest that the preferential usage of the RRACH motifs in m6A modification of cellular RNAs could be altered during HIV-1 infection.

We also performed the GO analysis of m6A-modified cellular genes in HIV-1 infected Jurkat cells and primary CD4+ T cells and found numerous genes with known functions in viral infection-related pathways. We defined these genes as viral-specific genes and performed separate analysis of the distribution and motif of methylation peaks on these genes (Figure 1–figure supplement 4A, B). We have also performed individual GO analysis of genes with unique methylation peaks in infected samples, the results showed that these genes enrich in functional clusters, such as metabolism, immune system process, multicellular organismal process, and development (Figure 1–figure supplement 4C, D), indicating widespread impacts on host biological systems induced by HIV-1 infection.

**YTHDF1–3 proteins bind to HIV-1 gRNA in infected cells.** YTHDF1–3 proteins are reader proteins that specifically bind to m6A-methylated cellular RNAs (Wang et al., 2014; Wang et al., 2015). We utilized the crosslinking and immunoprecipitation (CLIP) assay combined with RNA-seq (Hafner et al., 2010; Liu et al., 2015) to map the binding sites of YTHDF1–3 proteins in the HIV-1 genome in infected HeLa cells that overexpressed individual FLAG-tagged YTHDF1–3 proteins (Figure 2A). We identified multiple CLIP peaks of YTHDF1–3 protein-bound HIV-1 RNA, including the transactivation response element (TAR) in the 5’ UTR leader sequence, the *gag* gene, the Rev response element (RRE) in the *env* gene*,* in the *rev* gene, and the 3’ UTR (Figure 1C). Some of the YTHDF-binding sites (such in the 3’ and 5’ UTR and the *gag* gene) partially overlap with the identified m6A-containing regions in the HIV-1 genome (Figure 1A-C). Of note, we observed a unique high peak within the *rev* gene of HIV-1 RNA bound by YTHDF1 (Figure 1C, top panel), suggesting that YTHDF1 may bind HIV-1 RNA differently from YTHDF2–3. These data demonstrate that YTHDF1–3 proteins bind to m6A-modified HIV-1 gRNA during viral infection.

**YTHDF1–3 proteins negatively regulate HIV-1 post-entry infection.** Because HIV-1 RNAs are present in the cytoplasm and the nucleus of infected cells at different stages of viral lifecycle (Goff, 2007), we hypothesized that YTHDF1–3 proteins may directly interact with methylated HIV-1 RNAs, thereby affecting the metabolism and/or processing of the viral RNA. To examine the roles of YTHDF1–3 proteins in post-entry HIV-1 infection, we either overexpressed or knocked down the individual YTHDF proteins in human cell lines, and examined the effect on HIV-1 infection using a single-cycle, luciferase reporter HIV-1 pseudotyped with vesicular stomatitis virus G protein (VSV-G) to overcome the requirement of HIV-1 receptors during viral entry (Wang et al., 2007). Compared to vector control cells, at 24 hr post-infection (hpi), overexpression of individual FLAG-tagged YTHDF1–3 proteins in HeLa cells (Figure 2A) significantly inhibited HIV-1 infection by approximately 10-fold (Figure 2B, *P<*0.0005) and drastically reduced the synthesis of full-length viral Gag protein (Pr55) (Figure 2C). In contrast, stable knockdown of individual, endogenous YTHDF1–3 proteins in HeLa cells (Figure 2D) significantly increased HIV-1 infection by 4- to 14-fold (*P<*0.05) relative to control cells (Figure 2E). Overexpression or knockdown of YTHDF1–3 proteins in HeLa cells did not affect cell proliferation (data not shown).

To confirm these observations in CD4+ T-cells, we generated Jurkat cell lines with knockdown of individual, endogenous YTHDF1–3 proteins (Figure 3A) and did not observe a significant change in proliferation of the knockdown cells relative to parental or vector-control Jurkat cells (Figure 3B). The partial knockdown of YTHDF1 or YTHDF3 in Jurkat cells increased HIV-1 infection by 3- to 4-fold (*P<*0.005), while YTHDF2 knockdown slightly increased viral infection (Figure 3A and 3C) at 24 hpi. Furthermore, knockdown of individual, endogenous YTHDF1–3 proteins in activated primary CD4+ T-cells from healthy donors enhanced HIV-1 infection by approximately 2-fold (*P<*0.005) (Figure 3D and 3E), confirming the effects observed in cell lines despite a lesser extent. The treatment of cells with the HIV-1 reverse transcriptase inhibitor azidothymidine (AZT) was used as a negative control to show the expected HIV-1 inhibition (Figure 2B, 2E, 3C and 3E). Overall, these data suggest that overexpression of YTHDF1–3 proteins significantly inhibits HIV-1 infection, while knockdown of these proteins efficiently promotes HIV-1 gene expression. Thus, endogenous YTHDF1–3 proteins in CD4+ T-cells act as negative regulators to inhibit post-entry HIV-1 infection.

**YTHDF1–3 proteins inhibit HIV-1 infection by blocking viral reverse transcription.** To investigate the mechanisms of HIV-1 inhibition by YTHDF1–3 proteins, we assessed the stage of HIV-1 life cycle affected by the YTHDF1–3 proteins. We first measured levels of HIV-1 late reverse transcription (RT) products in infected cells, which represent the levels of the full-length viral cDNA (St Gelais et al., 2015). Overexpression of each of the YTHDF1–3 proteins in HeLa cells significantly reduced the level of HIV-1 late RT products by 4- to 10-fold (*P<*0.005) compared to the vector control cells at 24 hpi (Figure 4A), suggesting that the inhibition of viral reverse transcription contributes to the impairment of post-entry HIV-1 infection. In contrast, the knockdown of individual YTHDF1–3 proteins in HeLa cells elevated the levels of HIV-1 late RT products by 2- to 3-fold compared to vector control cells (Figure 4B). Furthermore, the level of HIV-1 2-LTR circles in infected HeLa cells, a surrogate marker of nuclear import of viral cDNA (Dong et al., 2007), was also significantly reduced over 10-fold (*P<*0.05) by overexpression of YTHDF1–3 proteins (Figure 4C), corresponding to the reduced late RT products observed in this experiment. Using our established Jurkat cell lines with stable knockdown of individual YTHDF1–3 proteins (Figure 3A), we found that the levels of HIV-1 late RT products were significantly increased in YTHDF1 down-regulated cells by 2.7-fold (*P<*0.05) compared to control cells, while the knockdown of YTHDF2 or YTHDF3 only increased late RT products by 20-30% (Figure 4D). As a negative control, AZT-treated cells showed inhibition of HIV-1 post-entry infection as expected (Figure 4A-D).

The effects on HIV-1 late reverse transcription mediated by YTHDF1–3 would lead to altered viral gene expression. To examine the impacts of the YTHDF proteins on viral gene expression, we quantified HIV-1 *gag* mRNA in infected cells at 24 hpi. The HIV-1 *gag* mRNA level in HeLa cells with overexpression of individual YTHDF1–3 showed a 4-fold reduction (*P<*0.0005) compared to vector control cells (Figure 4–figure supplement 1A). In contrast, the knockdown of individual YTHDF1–3 in HeLa cells increased the level of *gag* mRNA by 8- to 12-fold (*P<*0.05) compared to vector control cells (Figure 4–figure supplement 1B). The knockdown of YTHDF3 in Jurkat cells significantly increased the level of HIV-1 *gag* mRNA by 2-fold (*P<*0.05) compared to control cells, while the knockdown of YTHDF1 or YTHDF2 did not have a significant effect (Figure 4–figure supplement 1C). The different effects of YTHDF1–3 silencing on *gag* mRNA expression in HeLa and Jurkat cells might result from the difference in the knockdown efficiency in these cells (Figure 2D and 3A). These data suggest that YTHDF1–3 proteins could negatively regulate HIV-1 mRNA transcription, in addition to inhibiting viral reverse transcription in HIV-1 infected cells.

**YTHDF1–3 proteins are associated with HIV-1 gRNA and lead to degradation of viral RNA.** We hypothesize that YTHDF1–3 proteins could inhibit the reverse transcription of HIV-1 gRNA through directly binding to the gRNA. To test this hypothesis, we used a single-cycle, VSV-G-pseudotyped HIV-1 to infect HeLa cells overexpressing individual YTHDF1–3 proteins or vector control cells, immunoprecipitated YTHDF proteins from the infected cells at 3 hpi, and then measured HIV-1 gRNA levels in the IP samples. The presence of YTHDF proteins was confirmed in the input and IP samples (Figure 5A). The quantification of the HIV-1 gRNA by qRT-PCR revealed a strong and specific association (*P<*0.005) of HIV-1 gRNA with YTHDF proteins in HIV-1-infected YTHDF1–3-expressing cells compared to control cells (Figure 5B). To examine the impact of YTHDF1–3 on HIV-1 *gag* RNA kinetics, we quantified HIV-1 *gag* RNA levels in YTHDF1–3-expressing HeLa cells and vector control cells over a time course of 6-24 hpi. The relative levels of *gag* RNA in HIV-1 infected cells were normalized to that of the vector control cells at 6 hpi. In the control cells, compared to 6 hpi (set as 100%), the level of *gag* RNA was reduced to 40% at 12 hpi and then increased to 80% at 24 hpi (Figure 5C), suggesting degradation of HIV-1 gRNA at 12 hpi during the reverse transcription and then increased *gag* mRNA at 24 hpi during viral gene transcription. In contrast, the levels of *gag* RNA in YTHDF1–3-expressing cells were reduced to 40% at 12 hpi and to 13-25% at 24 hpi (*P<*0.0005) compared to that of the vector control cells at 6 hpi (Figure 5C). These data suggest that YTHDF1–3 proteins can degrade HIV-1 *gag* RNA in infected cells, thereby leading to inhibition of HIV-1 reverse transcription.

**The m6A writers and erasers affect HIV-1 Gag expression in virus producer cells.** We examined the role of the m6A writers in HIV-1 protein expression and viral release in virus-producing cells. We knocked down endogenous METTL3, METTL14, or both, in HEK293T cells using siRNA, and then transfected the cells with an HIV-1 proviral DNA plasmid (pNL4-3). We determined the levels of HIV-1 Gag protein expression in the cells and the capsid p24 protein released in the supernatants. Interestingly, we found that partial knockdown of METTL3, METTL14, or both, inhibited HIV-1 Gag expression in the cells by 60-70% (Figure 6A), and reduced the levels of HIV-1 p24 release by 30-50% compared to control cells (Figure 6B). These results suggest that the m6A writers are required for efficient HIV-1 protein synthesis, and that m6A modification of HIV-1 RNA could facilitate translation of viral proteins.

We next examined the role of the m6A erasers in HIV-1 protein expression and viral release in virus-producing cells. We knocked down endogenous AlkBH5, FTO, or both, in HEK293T cells using siRNA, and then transfected the cells with the pNL4-3 plasmid. We determined the levels of HIV-1 Gag protein expression in the cells and the capsid p24 protein released in the supernatants. Interestingly, we found that partial knockdown of FTO significantly promoted HIV-1 Gag synthesis in the cells by 2.5- to 6.5-fold (Figure 6C), and increased the levels of HIV-1 p24 release by 2- to 3-fold compared to control cells (Figure 6D). Thus, the m6A modification of HIV-1 RNA can enhance HIV-1 protein synthesis. Our results are in agreement with a recent report (Lichinchi et al., 2016) showing that silencing of the m6A writers (METTL3 and METTL14) or the eraser AlkBH5 decreases or increases HIV-1 p24 expression in the infected MT4 cells, respectively.

**Discussion**

The m6A modification of cellular mRNAs is coordinately regulated by the writers, erasers, and readers to control the metabolism and processing of methylated RNA (Fu et al., 2014). We found that HIV-1 RNA is m6A-methylated in infected cells, and that binding of YTHDF1–3 proteins to m6A-methylated HIV-1 RNA inhibits viral reverse transcription and gene expression. In contrast, partial knockdown of the m6A writers decreased HIV-1 Gag synthesis and viral release, while partial knockdown of FTO had the opposite effects, suggesting that m6A modification of HIV-1 RNA could enhance HIV-1 protein synthesis and viral release. Based on our results, we propose a working model suggesting that YTHDF proteins inhibit post-entry HIV-1 infection by blocking viral reverse transcription and mRNA expression, while the m6A modification of HIV-1 RNA can promote viral protein translation (Figure 7).

It is possible that YTHDF protein-mediated inhibition of HIV-1 infection can result from indirect effects on cellular RNA stability or gene expression, rather than direct inhibition of HIV-1 replication. We noticed a differential level of the effect on HIV-1 infection in different cell types by manipulating the individual YTHDF1–3 proteins. It is possible that the different effects are due to distinct cellular functions and mechanisms of YTHDF proteins (Fu et al., 2014). Recent studies indicated that YTHDF1 is responsible for translation promotion, and that YTHDF2 is responsible for mRNA decay, while the function YTHDF3 is unclear, but likely to aid in the temporal-spatial transport and delivery of mRNA (Wang and He, 2014; Wang et al., 2014; Wang et al., 2015). Indeed, we observed a unique high peak within the *rev* gene of HIV-1 RNA bound by YTHDF1 (Figure 1C), while YTHDF1 and YTHDF2 appear to have similar inhibitory effects on HIV-1 infection. It is possible that YTHDF1 and YTHDF2 may interact with different host proteins that directly or indirectly affect HIV-1 replication and lead to similar effects on viral inhibition. Furthermore, these three YTHDF proteins may have functional redundancy, and individual knockdown of one YTHDF protein may result in a modest effect because the other two could compensate the function. A recent study suggests that the dynamic m6A modification of cellular mRNA is a result of stress-induced nuclear localization and upregulation of YTHDF2 (Zhou et al., 2015). It is conceivable that HIV-1 infection of cells may induce the changes of cellular localization and expression levels of YTHDF proteins, thereby affecting HIV-1 RNA replication and viral infection.

The mechanisms by which m6A modification of HIV-1 RNA regulates viral infection remain to be elucidated. Lichinchi *et al*. recently showed that m6A modification of a conserved adenosine (A7883) in the stem loop II region of HIV-1 Rev response element (RRE) RNA increased binding of HIV-1 Rev protein to the RRE and facilitated nuclear export of RNA, thereby enhancing HIV-1 replication (Lichinchi et al., 2016). However, other m6A sites in the HIV-1 genome (such as in the *gag, pol, tat,* and *rev* genes) might also be critical for viral replication. Future studies using targeted mutations of the identified m6A sites in HIV-1 genome may lead to a loss of the effects on HIV-1 infection by YTHDF1–3 knockdown or overexpression.

During the revision of this manuscript, Kennedy *et al*. reported that m6A modification of HIV-1 mRNAs enhances viral replication and gene expression (Kennedy et al., 2016). Our data of the inhibitory effects on HIV-1 infection by YTHDF1–3 proteins are different from the results recently reported by Kennedy *et al.* (Kennedy et al., 2016). They showed that overexpression of YTHDF1–3 proteins in HEK293T cells enhanced HIV-1 mRNA and protein expression in a single-cycle infection, and that overexpression or knockout of YTHDF2 in CEM-SS T-cells increased or decreased HIV-1 replication and protein expression, respectively (Kennedy et al., 2016). The mapping of m6A sites in HIV-1 RNA between the previous data (Kennedy et al., 2016; Lichinchi et al., 2016) and the results presented in this manuscript are also different. Different approaches, cell lines and other reagents used in these studies may contribute to distinct results obtained, which remain to be clarified in the future. However, we report here consistent m6A mapping results using Jurkat T-cells and primary CD4+ T-cells and systematic evaluation of the roles of the m6A writers, readers, and erasers in HIV-1 infection.

Chemical modifications of viral RNAs such as m6A may protect viral genomes or mRNA from recognition by cellular innate immunity proteins (Fu et al., 2014). The m6A modification of HIV-1 RNA could serve as an immune evasion strategy, wherein the virus may escape detection by innate immunity against infection. In response to HIV-1 infection, the host may evolve and utilize the YTHDF1–3 proteins to bind the m6A-modified viral RNA and inhibit its reverse transcription and subsequent viral mRNA expression. Our findings can stimulate further studies on the precise role of m6A in HIV-1 RNA replication and the mechanisms of m6A regulation pathways that impact HIV-1 infection in cells. Because m6A-modified RNA has also been found in other viruses (Beemon and Keith, 1977; Canaani et al., 1979; Hashimoto and Green, 1976; Krug et al., 1976), this modification pathway may represent a novel and conserved target for antiviral development.

**Materials and methods**

**Cell culture.** Human healthy primary CD4+ T-cells were isolated from healthy blood donors’ buffy coats (purchased from American Red Cross Blood Service, Columbus, OH) using anti-human CD4-coated magnetic particles according to the manufacturer’s instructions (BD Biosciences) as described (St Gelais et al., 2014; St Gelais et al., 2015). Isolated CD4+ T cells were maintained in complete RPMI media containing interleukin-2 (20 U/ml, Peprotech) and activated with phytohemagglutinin A (PHA, Sigma-Aldrich) as described (St Gelais et al., 2014). HEK293T cells, Jurkat cells, and the HIV-1 indicator cell line GHOST/X4/R5 were cultured as described (St Gelais et al., 2014; St Gelais et al., 2015). HeLa cells overexpressing the empty vector (pPB-CAG), YTHDF1, YTHDF2, or YTHDF3 were maintained in complete DMEM containing 2 µg/ml of puromycin. All parental cell lines were obtained from the American Type Culture Collection (ATCC) and the identity of the cell lines has been authenticated using short tandem repeat profiling or genotyping methods as described (Wu et al., 2004). All the cell lines were tested negative for mycoplasma contamination using a PCR-based universal mycoplasma detection kit (ATCC).

**Cell proliferation assay.** Cell proliferation of HeLa cells or Jurkat cells with YTHDF1–3 overexpression or knockdown respectively were determined by the MTS assay (Promega) as described (St Gelais et al., 2015). Cells (2×104) were plated in triplicate in a 96-well plate and cultured for 3 days and the absorbance was read at 490 nm at the indicated times.

**Plasmids and shRNA- and siRNA-mediated gene silencing.** HIV-1 proviral DNA vector pNL4-3, pNL-Luc-E−R+ containing a firefly luciferase reporter gene and the empty vector control were described (de Silva et al., 2012). The pPB-CAG plasmid vector was used to overexpress the YTHDF1–3 proteins in HeLa cells. pLenti vectors carrying specific YTHDF1–3 shRNAs (Table 1) were used to knockdown of YTHDF1–3 proteins in different cell types as described (St Gelais et al., 2015). Jurkat cells transduced with lentivirus containing shRNAs specific for YTHDF1, YTHDF2, and YTHDF3 were maintained in puromycin (3 µg/ml) containing complete RPMI media. AlkBH5, FTO, METTL3 and METTL14 gene expression in HEK293T cells was silenced by two rounds of siRNA transfection using specific siRNA (Qiagen, sequences listed in Table 2) transfected with the Lipofectamin RNAiMax reagent (Invitrogen) according to the manufacturer protocol (reversible siRNA transfection method). Briefly, HEK293T cells (1.5×105) were transfected with specific siRNA or a non-specific control (80 nM). At 24 hr post-transfection, media were replaced and the second round of siRNA transfection was performed using the same siRNA concentration (80 nM). The pNL4-3 construct (0.5 μg) was transfected into the cells (1.5×105) 6 hr after of the second round transfection and cells were harvested for immunoblotting 36 hr after the proviral DNA transfection.

**HIV-1 infection assays.** Single-cycle, luciferase reporter HIV-1 stock (HIV-Luc/VSV-G) was generated by calcium phosphate co-transfection of HEK 293T cells with the pNL-Luc-E–R+ and pVSV-G as described (St Gelais et al., 2014). The infectious units of virus stocks were evaluated by limiting dilution on GHOST/X4/R5 cells as described (Wang et al., 2007). HIV-1 infection assays using luciferase reporter viruses were performed using a multiplicity of infection (MOI) of 0.5 as described (de Silva et al., 2012). Cell lysates were obtained 24 hpi and analyzed for luciferase activity using a commercially available kit (Promega) according to the manufacturer’s instructions. Total cell protein was quantified using a bicinchoninic acid assay (BCA; Pierce) and all luciferase results were normalized to total protein amounts. HIV-1 capsid p24 levels in supernatants were measured by an enzyme-linked immunosorbent assay (ELISA) using anti-p24-coated plates (AIDS and Cancer Virus Program, NCI-Frederick, MD) as described (Wang et al., 2007). Jurkat cells were infected with replication-competent HIV-1NL4-3 at an MOI of 0.5 as described (Wang et al., 2007). At 72 hpi, cells were washed 3 times and harvested for total RNA extraction using RNAeasy kit (Qiagen). PHA-activated primary CD4+ T cells were infected with HIV-1NL4-3 (40 ng p24 equivalent HIV-1 per 106 cells) and cells were harvested at 96 hpi for total RNA extraction using RNAeasy kit (Qiagen).

**m6A-seq.** High-throughput sequencing of HIV-1 methylome was carried out using m6A-seq (Dominissini et al., 2012) and followed the protocol published previously (Dominissini et al., 2012). In brief, total RNA containing HIV-1 RNA was extracted from the cells and purified by poly (dT) beads. Purified polyadenylated RNA was mixed with 2.5 μg of affinity purified anti-m6A polyclonal antibody (202003; Synaptic Systems) in IPP buffer (150 mM NaCl, 0.1% NP-40, 10 mM Tris-HCl, pH 7.4) and incubated for 2 hr at 4 °C. RNA was used for library generation with small RNA sequencing kit (NEB). Sequencing was carried out on Illumina HiSeq 2000 according to the manufacturer’s instructions.

**Quantification of HIV-1 RNA m6A level using liquid chromatography-mass spectrometry (LC-MS/MS).** HIV-1 gRNA (250 μg) was isolated from highly purified HIV-1MN virions (total p24 capsid 600 μg) (Rossio et al., 1998; Wang et al., 2008) using an RNeasy Mini kit (Invitrogen), and subjected to quantitative analysis of m6A level using LC-MS/MS as described (Jia et al., 2011).

**Quantitative PCR and RT-PCR.** Quantitative PCR (qPCR) was performed to assess the relative levels of HIV-1 late reverse transcription (RT) products and 2-LTR circles as described (de Silva et al., 2012; Dong et al., 2007). Reverse transcription PCR (RT-PCR) was used to measure HIV-1 *gag* mRNA as described (Dong et al., 2007). To amplify HIV-1 late RT products in cells transduced with pLenti vectors, a different set of primers (LW59 and LW60) were used as described (St Gelais et al., 2015). Sequences of PCR primers and probes are listed in Table 3. All HIV-1 stocks used for PCR assays were treated with DNaseI (40 U/ml; Ambion) prior to infections to avoid plasmid DNA contamination.

**Antibodies and immunoblotting.** The antibodies used in this study were: anti-GAPDH (clone 4G5, AbD serotec), anti-FLAG (F-3165, Sigma-Aldrich), anti-FTO (ab124892, Abcam), anti- AlkBH5 (HPA007196, Sigma-Aldrich), anti-METTL3 (15073-1-AP, Proteintech Group), anti-METTL14 (HPA038002, Sigma), anti-YTHDF1 (ab99080; Abcam), anti-YTHDF2 (ABE542, EMD Millipore), anti-YTHDF3 (ab103328; Abcam), and anti-HIV-1 Gag (clone #24-2, the NIH AIDS Reagent Program). Cells were harvested and lysed in cell lysis buffer (Cell Signalling) supplemented with protease inhibitor cocktails (Sigma-Aldrich). Immunoblotting was performed as described (St Gelais et al., 2015). Detection of GAPDH (glyceraldehyde-3-phosphate dehydrogenase) expression was used as a loading control.

**Immunoprecipitation and RNA isolation.** HeLa cells expressing pPB-CAG vector or YTHDF1–3 (2.5×106 cells) were seeded in a 60 mm-diameter culture plate. Cells were infected with HIV-Luc/VSV-G at an MOI of 5 for 3 hr. Cells were UV-cross-linked, lysed in cell lysis buffer (Sigma-Aldrich). The cells were incubated in lysis buffer for 10 min on ice with frequent mixing and were sonicated to ensure maximum lysis. The lysed cell suspension was centrifuged for 5 min at 9,300 × g at 4°C. The supernatant was transferred to fresh tubes and equal amount of cell lysates were mixed with anti-FLAG-conjugated protein G beads and rotated for 2 hr at 4°C. After the incubation, beads were washed 3 times with cell lysis buffer. Co-immunoprecipitated RNA was isolated from the immunoprecipitates using Trizol (Invitrogen), and RNeasy columns (Qiagen) with an on-column DNase I treatment (Qiagen) and eluted with RNase-free water. Equal volumes of RNA were used as a template for first-strand cDNA synthesis, according to the manufacturer’s instructions.

**CLIP-seq.** We followed the previously reported protocol of the PAR (photoactivatable ribonucleoside-enhanced)-CLIP assay (Hafner et al., 2010) with the following modifications. As HIV-1 infection was inhibited by the addition of 4-thiouridine (data not shown), we omitted that step and performed crosslinking directly. Briefly, six 15-cm plates of HeLa cells stably expressing YTHDF1–3 proteins were seeded at day 1. At day 2, the HeLa cells were infected with the HIV-1-Luc/VSV-G at an MOI of 0.5 for 2 hr, cells were washed to remove cell-free HIV-1. At day 3, the cells were washed once with 10 mL ice-cold PBS. Cell plates were placed on a tray with ice and irradiated, uncovered, with 0.15 J/cm2 of 254 nm UV light three times in a Stratalinker 2400 (Stratagene). Cells were scraped off in PBS and transferred to centrifugation tubes and collected by centrifugation at 500 × g for 5 min at 4°C. The cell pellets were lysed in 3 volumes of 1% NP40 lysis buffer and incubated on ice for 10 min. The cell lysates were cleared by centrifugation at 13,000 × g for 15 min at 4oC. Anti-FLAG antibodies were used in the IP as previously described. The recovered RNA samples were further cleaned by RNA Clean & Concentrator (Zymo Research) before library construction using the small RNA sample preparation kit (NEB). The first round of RNase T1 digest was carried out at 0.2 U/μl for 15 min and the second round digestion was conducted at 10 U/μl for 8 min.

**Measurement of the kinetics of HIV-1 RNA in infected cells.** HeLa cells over-expressing individual YTHDF1–3 proteins or the pPB-CAG vector were infected with HIV-1-Luc/VSV-G (MOI of 0.5). Cells were collected at 6, 12 and 24 hpi. Total RNA was isolated from the cells using RNeasy columns (Qiagen) with on-column DNase I treatment (Qiagen) and eluted with RNase-free water. Quantitative RT-PCR was used to measure HIV-1 *gag* RNA levels as described (Dong et al., 2007). Sequences of PCR primers are listed in Table 3. All HIV-1 stocks used for infection were treated with DNaseI (40 U/ml; Ambion) prior to infections to avoid plasmid DNA contamination.

**GO analysis.**  GO analysis was performed using the GO Enrichment Analysis tool from the Gene Ontology Consortium (Gene Ontology, 2015). GO graphs was plotted using the Web server REVIGO (Supek et al., 2011).

**Statistical analysis.** Data were analyzed using Mann-Whitney’s U test or one-way ANOVA test with Prism software and statistical significance was defined as P<0.05.

**Acknowledgements**

The authors thank Dr. Jeffrey D. Lifson (NCI-Fredrick) for providing purified HIV-1 virions, Suresh de Silva for technical assistance, and Corine St. Gelais for critical reading the manuscript. The antibody to HIV-1 Gag (clone #24-2) and the HIV-1 RT inhibitor AZT were obtained from the NIH AIDS Reagent Program. This work was supported by NIH grants AI104483 to LW and AI074658 to CH and a seed grant to LW from the Center for RNA Biology at The Ohio State University (OSU). LW is also supported in part by NIH grants (CA181997 and AI120209) and the Public Health Preparedness for Infectious Diseases Program of OSU. CH is an investigator of the Howard Hughes Medical Institute.

**References**

Beemon, K., and Keith, J. (1977). Localization of N6-methyladenosine in the Rous sarcoma virus genome. J Mol Biol *113*, 165-179.

Canaani, D., Kahana, C., Lavi, S., and Groner, Y. (1979). Identification and mapping of N6-methyladenosine containing sequences in simian virus 40 RNA. Nucleic Acids Res *6*, 2879-2899.

de Silva, S., Planelles, V., and Wu, L. (2012)..

*et al.* (2012). Topology of the human and mouse m6A RNA methylomes revealed by m6A-seq. Nature *485*, 201-206.

Janas, A.M., Wang, J.H., Olson, W.J., and Wu, L. (2007). Characterization of human immunodeficiency virus type 1 replication in immature and mature dendritic cells reveals dissociable cis- and trans-infection. J Virol *81*, 11352-11362.

Fu, Y., Dominissini, D., Rechavi, G., and He, C. (2014)..

Gene Ontology, C. (2015). Gene Ontology Consortium: going forward. Nucleic Acids Res *43*, D1049-1056.

Goff, S.P. (2007). Host factors exploited by retroviruses. Nat Rev Microbiol *5*, 253-263.

Hafner, M., Landthaler, M., Burger, L., Khorshid, M., Hausser, J., Berninger, P., Rothballer, A., Ascano, M., Jr., Jungkamp, A.C., Munschauer, M.*, et al.* (2010). Transcriptome-wide identification of RNA-binding protein and microRNA target sites by PAR-CLIP. Cell *141*, 129-141.

Hashimoto, S.I., and Green, M. (1976). Multiple methylated cap sequences in adenovirus type 2 early mRNA. J Virol *20*, 425-435.

Jia, G., Fu, Y., and He, C. (2013). Reversible RNA adenosine methylation in biological regulation. Trends Genet *29*, 108-115.

Jia, G., Fu, Y., Zhao, X., Dai, Q., Zheng, G., Yang, Y., Yi, C., Lindahl, T., Pan, T., Yang, Y.G.*, et al.* (2011). N6-methyladenosine in nuclear RNA is a major substrate of the obesity-associated FTO. Nat Chem Biol *7*, 885-887.

Kennedy, E.M., Bogerd, H.P., Kornepati, A.V., Kang, D., Ghoshal, D., Marshall, J.B., Poling, B.C., Tsai, K., Gokhale, N.S., Horner, S.M.*, et al.* (2016). Posttranscriptional m(6)A Editing of HIV-1 mRNAs Enhances Viral Gene Expression. Cell Host Microbe *19*, 675-685.

Krug, R.M., Morgan, M.A., and Shatkin, A.J. (1976)..

Kutluay, S.B., Zang, T., Blanco-Melo, D., Powell, C., Jannain, D., Errando, M., and Bieniasz, P.D. (2014)..

Lavender, C.A., Gorelick, R.J., and Weeks, K.M. (2015)..

Lichinchi, G., Gao, S., Saletore, Y., Gonzalez, G.M., Bansal, V., Wang, Y., Mason, C.E., and Rana, T.M. (2016)..

Liu, J., Yue, Y., Han, D., Wang, X., Fu, Y., Zhang, L., Jia, G., Yu, M., Lu, Z., Deng, X.*, et al.* (2014)..

Liu, N., Dai, Q., Zheng, G., He, C., Parisien, M., and Pan, T. (2015). N(6)-methyladenosine-dependent RNA structural switches regulate RNA-protein interactions. Nature *518*, 560-564.

Meyer, K.D., Saletore, Y., Zumbo, P., Elemento, O., Mason, C.E., and Jaffrey, S.R. (2012)..

Moir, S., Chun, T.W., and Fauci, A.S. (2011). Pathogenic mechanisms of HIV disease. Annu Rev Pathol *6*, 223-248.

Ping, X.L., Sun, B.F., Wang, L., Xiao, W., Yang, X., Wang, W.J., Adhikari, S., Shi, Y., Lv, Y., Chen, Y.S.*, et al.* (2014). Mammalian WTAP is a regulatory subunit of the RNA N6-methyladenosine methyltransferase. Cell research *24*, 177-189.

Rossio, J.L., Esser, M.T., Suryanarayana, K., Schneider, D.K., Bess, J.W., Jr., Vasquez, G.M., Wiltrout, T.A., Chertova, E., Grimes, M.K., Sattentau, Q.*, et al.* (1998)..

St Gelais, C., de Silva, S., Hach, J.C., White, T.E., Diaz-Griffero, F., Yount, J.S., and Wu, L. (2014). Identification of cellular proteins interacting with the retroviral restriction factor SAMHD1. J Virol *88*, 5834-5844.

St Gelais, C., Roger, J., and Wu, L. (2015). Non-POU domain-containing octamer-binding protein negatively regulates HIV-1 infection in CD4(+) T cells. AIDS Res Hum Retroviruses *31*, 806-816.

Supek, F., Bosnjak, M., Skunca, N., and Smuc, T. (2011). REVIGO summarizes and visualizes long lists of gene ontology terms. PLoS One *6*, e21800.

van Hemert, F., van der Kuyl, A.C., and Berkhout, B. (2014). On the nucleotide composition and structure of retroviral RNA genomes. Virus Res *193*, 16-23.

Wang, J.H., Janas, A.M., Olson, W.J., KewalRamani, V.N., and Wu, L. (2007)..

Wang, J.H., Wells, C., and Wu, L. (2008)..

Wang, X., and He, C. (2014). Reading RNA methylation codes through methyl-specific binding proteins. RNA Biol *11*, 669-672.

Wang, X., Lu, Z., Gomez, A., Hon, G.C., Yue, Y., Han, D., Fu, Y., Parisien, M., Dai, Q., Jia, G.*, et al.* (2014). N6-methyladenosine-dependent regulation of messenger RNA stability. Nature *505*, 117-120.

Wang, X., Zhao, B.S., Roundtree, I.A., Lu, Z., Han, D., Ma, H., Weng, X., Chen, K., Shi, H., and He, C. (2015). N(6)-methyladenosine Modulates Messenger RNA Translation Efficiency. Cell *161*, 1388-1399.

Watts, J.M., Dang, K.K., Gorelick, R.J., Leonard, C.W., Bess, J.W., Jr., Swanstrom, R., Burch, C.L., and Weeks, K.M. (2009). Architecture and secondary structure of an entire HIV-1 RNA genome. Nature *460*, 711-716.

Wilkinson, K.A., Gorelick, R.J., Vasa, S.M., Guex, N., Rein, A., Mathews, D.H., Giddings, M.C., and Weeks, K.M. (2008)..

Wu, L., Martin, T.D., Carrington, M., and KewalRamani, V.N. (2004). Raji B cells, misidentified as THP-1 cells, stimulate DC-SIGN-mediated HIV transmission. Virology *318*, 17-23.

Yue, Y., Liu, J., and He, C. (2015)..

Zheng, G., Dahl, J.A., Niu, Y., Fedorcsak, P., Huang, C.M., Li, C.J., Vagbo, C.B., Shi, Y., Wang, W.L., Song, S.H.*, et al.* (2013). ALKBH5 is a mammalian RNA demethylase that impacts RNA metabolism and mouse fertility. Mol Cell *49*, 18-29.

Zhou, J., Wan, J., Gao, X., Zhang, X., Jaffrey, S.R., and Qian, S.B. (2015)..

**Figure titles and legends**

**Figure 1. HIV-1 RNA contains m6A modifications and YTHDF1–3 proteins bind to m6A-modified HIV-1 RNA. (A-B)** The distribution of m6A reads from m6A-seq mapped to HIV-1 genome (red line) in HIV-1 infected Jurkat cells (A) or primary CD4+ T-cells (B). Baseline signal from the RNA-seq of input samples is shown as a black line. A schematic diagram of HIV-1NL4-3 genome is shown above. TAR, transacting response element; RRE, Rev response element. Jurkat cells (A) or primary CD4+ T-cells (B) were infected with HIV-1NL4-3 and total RNA was extracted for m6A-seq at 72 or 96 hr post-infection (hpi), respectively. **(C)** YTHDF1–3 proteins bind to the HIV-1 gRNA. HeLa cells overexpressing individual FLAG-tagged YTHDF1–3 proteins were infected with HIV-1-Luc/VSV-G at a multiplicity of infection (MOI) of 0.5 for 2 hrread density and the HIV-1 genome organization and corresponding nucleotide positions are shown. All data presented are representative of duplicate samples (n=2) in at least two independent experiments.

**Figure 2. YTHDF1–3 proteins negatively regulate post-entry HIV-1 infection in HeLa cells. (A-B)** Overexpression ofYTHDF1–3 proteins in HeLa cells significantly inhibits HIV-1 infection compared to vector control cells. **(A)** Overexpression ofYTHDF1–3 proteins in HeLa cells was confirmed by immunoblotting. **(B)** HeLa cells overexpressing YTHDF1–3 proteins were infected with HIV-1 Luc/VSV-G at an MOI of 0.5 and viral infection was measured by luciferase activity at 24 hpi. **(C)** Overexpression of YTHDF1–3 proteins inhibits HIV-1 Gag protein synthesis in infected cells.HeLa cells overexpressing individual YTHDF1–3 proteins or the vector control cells were infected by HIV-1-Luc/VSV-G at an MOI of 0.5. At 24 hpi, the expression of HIV-1 Gag and YTHDF1–3 proteins (FLAG-tagged) was determined using immunoblotting. GAPDH was used as a loading control and mock-infected vector control cells were used as a negative control. **(D and E)** Individual knockdown of endogenous YTHDF1–3 proteins in HeLa cells significantly increases HIV-1 infection compared to vector control cells. HIV-1 infection assays were performed as described for panel B. * *P<*0.05, ** *P<*0.005, and *** *P<*0.0005, compared to vector control without AZT treatment. All results are shown as mean ±SD (n=3) and data presented are representative of at least three independent experiments.

**Figure 3. YTHDF1–3 proteins negatively regulate post-entry HIV-1 infection in CD4+ T-cells. (A)** Individual knockdown of endogenous YTHDF1–3 proteins in Jurkat CD4+ T cells was confirmed by immunoblotting. **(B)** Knockdown of YTHDF1–3 proteins does not affect proliferation of Jurkat cells.Jurkat cells (2×104) were seeded and cultured for 3 days. At the times indicated, cell proliferation was measured using the MTS assay. **(C)** Knockdown of YTHDF1–3 proteins significantly increases HIV-1 infection compared to vector control cells. **(D)** Individual knockdown of YTHDF1–3 proteins in activated primary CD4+ T-cells from a healthy donor. **(E)** Knockdown of YTHDF1–3 proteins significantly increases HIV-1 infection compared to vector control cells. (**A and D**) GAPDH was used as a loading control. (**C and E**) The vector controls without AZT were set as 100%. The reverse transcriptase inhibitor AZT treated cells were used as positive control for productive HIV-1 infection. * *P<*0.05, ** *P* <0.005, and *** *P* <0.0005, compared to vector control without AZT treatment. All results are shown as mean ±SD (n=3) and data presented are representative of at least three independent experiments.

**Figure 4. YTHDF1–3 proteins inhibit post-entry HIV-1 infection by blocking viral reverse transcription.** HeLa cells over-expressing or knocking-down (shRNA) individual YTHDF1–3 proteins were infected with HIV-1-Luc/VSV-G at an MOI of 0.5. **(A, B and D)** Genomic DNA was isolated from the cells 24 hr post-infection and HIV-1 late reverse transcription (RT) products were quantified by qPCR. **(C)** YTHDF family proteins reduce the formation of HIV-1 2-LTR circles in infected HeLa cells.At 24 hr post-infection, DNA was isolated from the cells and the 2-LTR circles were analyzed by qPCR and normalized to GAPDH levels. AZT treated vector control cells were used as a negative control for HIV-1 inhibition. * *P<*0.05 compared to the vector control without AZT treatment. All results are shown as mean ±SD (n=3) and data presented are representative of at least three independent experiments.

**Figure 5. YTHDF1–3 proteins bind to HIV-1 gRNA in infected cells. (A)** Immunoblotting of YTHDF1–3 proteins in the input and immunoprecipitation (IP) samples from HIV-1-Luc/VSV-G infected HeLa cells. FLAG antibodies were used to immunoprecipitate FLAG-tagged YTHDF1–3 proteins overexpressed in HeLa cells after HIV-1 infection. A short and long exposure of the immunoblot is shown. **(B)** HIV-1 gRNA is bound by YTHDF1–3 proteins expressed in HeLa cells. HeLa cells stably overexpressing FLAG-tagged YTHDF1–3 proteins or empty vector control cells (Ctrl) were infected with HIV-1-Luc/VSV-G at an MOI of 5 for 3 hr. Cell lysates were immunoprecipitated with anti-FLAG, RNA was extracted and HIV-1 *gag* RNA levels were measured. ** *P<*0.005 compared to the vector control cells. **(C)** YTHDF1–3 affect HIV-1 *gag* RNA kinetics. HIV-1 *gag* RNA levels in YTHDF1–3-expressing HeLa cells were quantified by qRT-PCR. The relative levels of *gag* RNA in infected cells were normalized to that of the vector control cells at 6 hr post-infection (hpi). *** *P<*0.0005, compared to the control cells at 6 hpi (set as 100%). All results are shown as mean ±SD (n=3) and data presented are representative of at least three independent experiments.

**Figure 6. The m6A writers and erasers** **affect HIV-1 Gag expression in virus producer cells. (A and B)** Individual or combinedknockdown of endogenous METTL3 and METTL14 inhibits HIV-1 Gag protein expression. HEK293T cells were transfected with indicated siRNA, and then with an HIV-1 proviral DNA plasmid (pNL4-3). Cells and supernatants were collected for analyses at 36 hr post-transfection. **(A)** Expression of METTL3, METTL14 and HIV-1 Gag proteins in the transfected HEK293T cells was detected by immunoblotting. **(C and D)** Knockdown of endogenous AlkBH5, FTO, or both promotes HIV-1 Gag protein expression.HEK293T cells were transfected with indicated siRNA, and then with pNL4-3. Cells and supernatants were collected at 36 hr post-transfection. **(C)** Expression of AlkBH5, FTO and HIV-1 Gag proteins in the cells was detected by immunoblotting. **(A and C)** GAPDH was used as a loading control. Relative levels of Gag expression were normalized to GAPDH levels. **(B and D)** HIV-1 capsid p24 levels in supernatants were measured by ELISA. The relative levels (%) are also shown. * *P<*0.05 compared to the siRNA control. The results are shown as mean ±SD (n=3) and data presented are representative of three independent experiments.

**Figure 7. Proposed mechanisms and dynamics of m6A modification of HIV-1 RNA in regulating viral infection in cells.** In the nucleus, the m6A writers (METTL3 and METTL14) add the m6A marker to HIV-1 genomic RNA (gRNA) or mRNA, and the m6A erasers (FTO and AlkBH5) remove the m6A modifications of HIV-1 RNA. The m6A modification of HIV-1 RNA can promote viral protein translation in cells. In contrast, cytoplasmic m6A readers (YTHDF1–3) bind to m6A-modified HIV-1 gRNA, which can result in inhibition of HIV-1 reverse transcription (RT), viral mRNA expression, and thereby HIV-1 infection in cells.

**Table 1. The shRNA sequences used in this study.**

| **shRNA** | **Sequences (5’-3’)** |
| --- | --- |
| Non-specific (vector) control | CCGGCAACAAGATGAAGAGCACCAACTCGAGTTGGTGCTCTTCATCTTGTTGTTTTT |
| YTHDF1 | CCGGCCCGAAAGAGTTTGAGTGGAACTCGAGTTCCACTCAAACTCTTTCGGGTTTTTG |
| YTHDF2 | CCGGCGGTCCATTAATAACTATAACCTCGAGGTTATAGTTATTAATGGACCGTTTTTG |
| YTHDF3 | CCGGGATAAGTGGAAGGGCAAATTTCTCGAGAAATTTGCCCTTCCACTTATCTTTTTG |

**Table 2. The siRNA sequences used in this study.**

| **siRNA** | **Sequences (5’-3’)** |
| --- | --- |
| METTL3 | 5’-CTGCAAGTATGTTCACTATGA-3’  5’-AGGAGCCAGCCAAGAAATCAA-3’ |
| METTL14 | 5’-TGGTGCCGTGTTAAATAGCAA-3’  5’-AAGGATGAGTTAATAGCTAAA-3’ |
| FTO | 5’-AAATAGCCGCTGCTTGTGAGA-3’ |
| AlkBH5 | 5’-AAACAAGTACTTCTTCGGCGA-3’ |

**Table 3. Sequences of PCR primers and probes used in this study.**

| **Primers** | **Sequences (5’-3’)** |
| --- | --- |
| HIV-1 *gag* forward | CTAGAACGATTCGCAGTTAATCCT |
| HIV-1 *gag* reverse | CTATCCTTTGATGCACACAATAGAG |
| Unspliced GAPDH forward | GGGAAGCTCAAGGGAGATAAAATTC |
| Unspliced GAPDH reverse | GTAGTTGAGGTCAATGAAGGGGTC |
| Spliced GAPDH forward | GGAAGGTGAAGGTCGGAGTCAACGG |
| Spliced GAPDH reverse | CTGTTGTCATACTTCTCATGGTTCAC |
| MH531 forward (for HIV-1 late reverse transcription (RT) products) | TGTGTGCCCGTCTGTTGTGT |
| BB reverse (for late RT products) | GGATTAACTGCGAATCGTTC |
| HIV-1 late RT product probe | TCGACGCAGGACTCGGCTTGCT |
| 2-LTR probe | AAGTAGTGTGTGCCCGTCTGTTGTGTGACTC |
| 2-LTR forward | GCCTGGGAGCTCTCTGGCTAA |
| 2-LTR reverse | GCCTTGTGTGTGGTAGATCCA |
| LW59 (forward, alternative for late RT detection in shRNA vector-transduced cells) | GACATAGCAGGAACTACTAGTACCC |
| LW60 (reverse, alternative for late RT detection in shRNA vector-transduced cells) | GGTCCTTGTCTTATGTCCAGAATGC |

**Figure 1–figure supplement 1.** Total RNA was extracted at 48 hr post-transfection and immunoprecipitated with an m6A-specific antibody. Enriched RNA was subjected to next generation sequencing. Peaks show the relative abundance of m6A sites on the HIV-1 genome. The distribution of m6A reads from m6A-seq mapped to HIV-1 genome (red line). Baseline signal from the RNA-seq of input samples is shown as a black line. A schematic diagram of HIV-1NL4-3 genome features is shown above. TAR, transacting response element; RRE, Rev response element.The data presented are representative of two independent experiments.

**Figure 1–figure supplement 2.**HIV-1 RNA (250 ng) was isolated from highly purified HIV-1MN virions (total 600 μg of p24 capsid) and subjected to quantitative analysis of the m6A level using LC-MS/MS (n=3 of each sample). The results are presented are from representative of two independent experiments.

**Figure 1–figure supplement 3. Distribution of m6A in cellular RNAs and the frequency of m6A motifs in HIV-1-infected cells. (A-B)** Pie charts show the distribution of m6A peaks in the 5′ UTR, coding DNA sequence (CDS), 3′ UTR, and noncoding regions of transcripts from uninfected and HIV-1-infected Jurkat T-cells (A) or primary CD4+ T-cells (B). The m6A peak distribution in HIV-1-specific RNAs is also shown. **(C-D)** Frequency of the RRACH motif (C) and the GGACU motif (D) within the m6A peaks in cellular RNAs from the uninfected control and HIV-1-infected cells. Data presented are the average results of duplicated samples (n=2).

**Figure 1–figure supplement 4. Gene ontology (GO) analysis of m6A-modifed cellular genes in HIV-1 infected cells. (A and B)** GO terms specific to virus related pathways and corresponding *P* values, clustered from methylated genes detected in Jurkat cells (A) or primary CD4+ T cells (B) infected with HIV-1. (**C and D**) GO graphs showing functional clusters from genes with unique m6A peaks identified in HIV-1-infected Jurkat cells (C) or primary CD4+ T-cells (D) when compared to uninfected cells. Data presented are the average results of duplicated samples (n=2).

**Figure 4–figure supplement 1.**an MOI of 0.5. Total RNA was isolated from the cells 24 hr* *P*<0.05, ** *P*<0.005, and *** *P*<0.0005, compared to vector control without AZT treatment. All results are shown as mean ±SD (n=3) and data presented are representative of at least three independent experiments.
