# Supplementary figures and images for: N6-methyladenosine of HIV-1 RNA regulates viral infection and HIV-1 Gag protein expression
Source: eLife journal article supplement (doi:10.7554/elife.15528), 2016-07-02

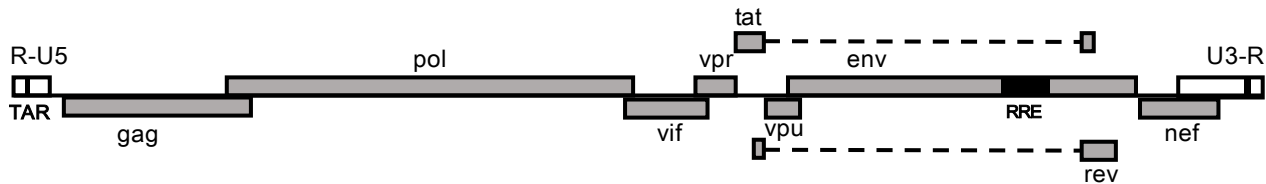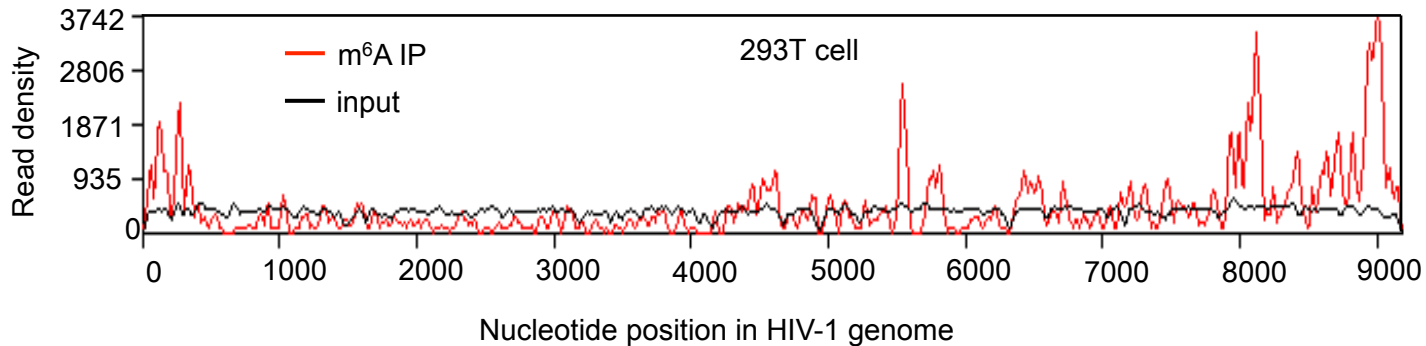

Supplement: supp [file elife-15528-supp-v1.zip › elife_poa_e15528_Figure_1_figure_supplement_1.pdf]

**A**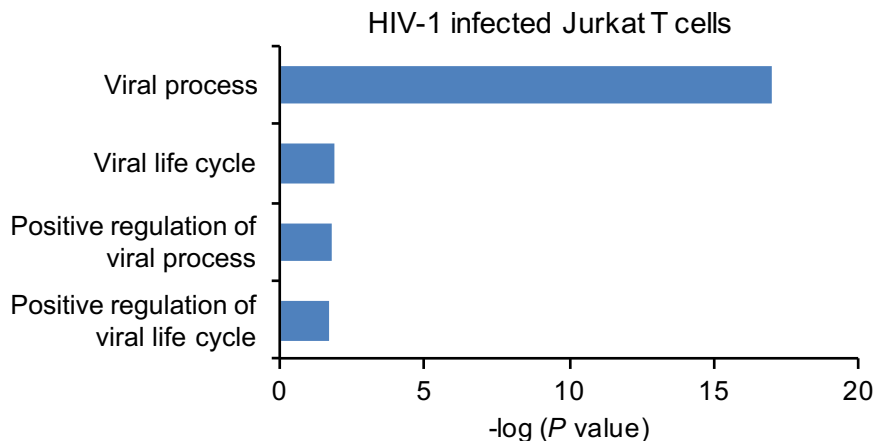**B**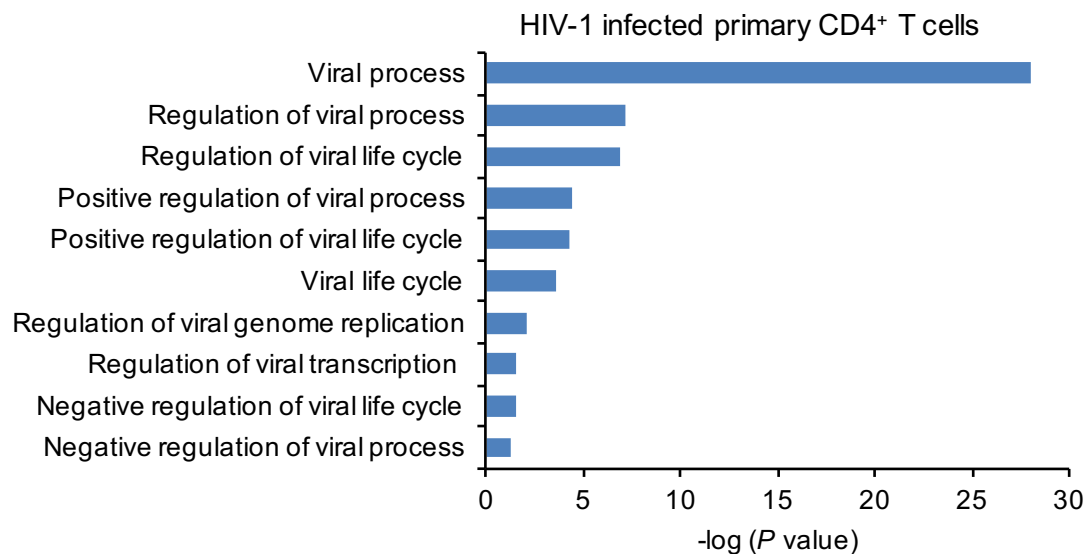**C**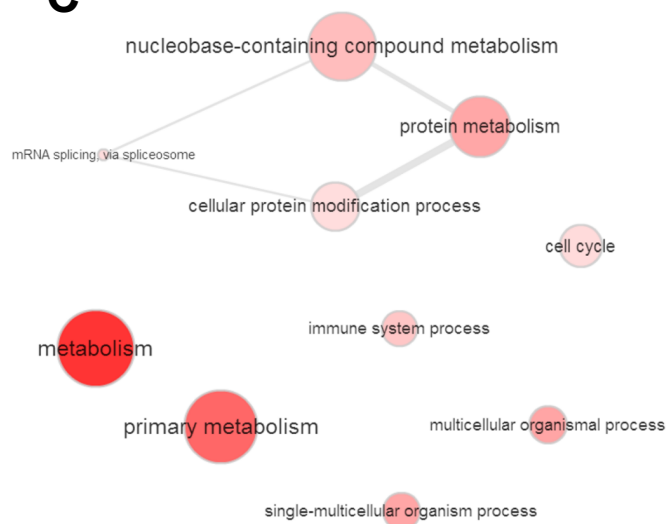**D**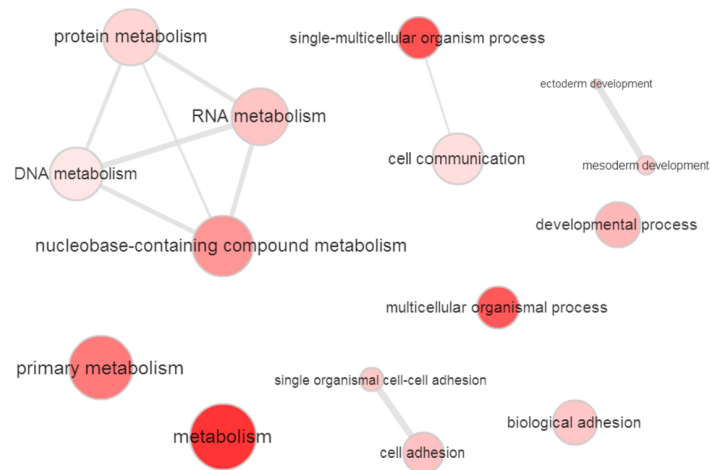

Supplement: supp [file elife-15528-supp-v1.zip › elife_poa_e15528_Figure_1_figure_supplement_4.pdf]

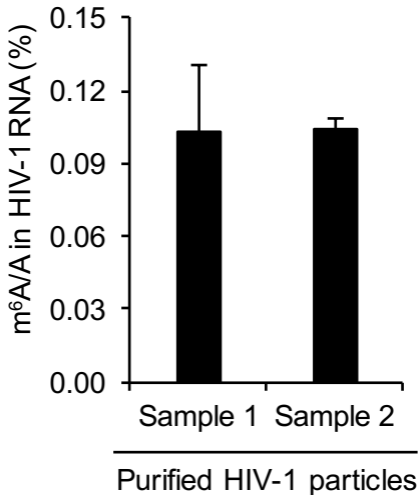

Supplement: supp [file elife-15528-supp-v1.zip › elife_poa_e15528_Figure_1_figure_supplement_2.pdf]

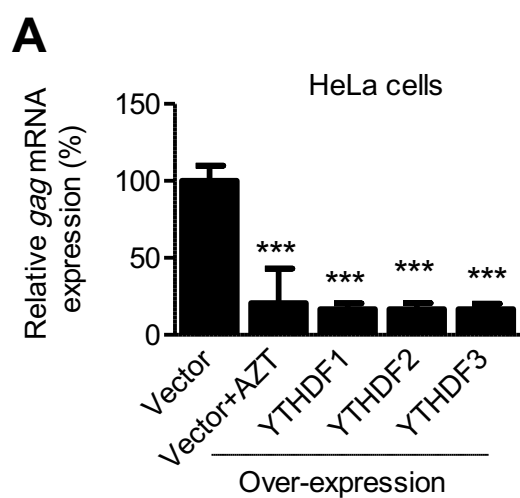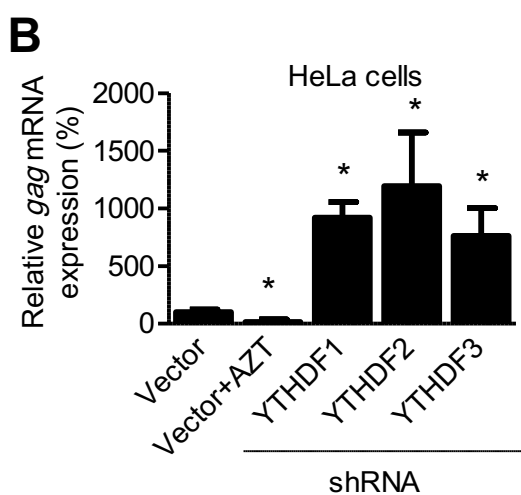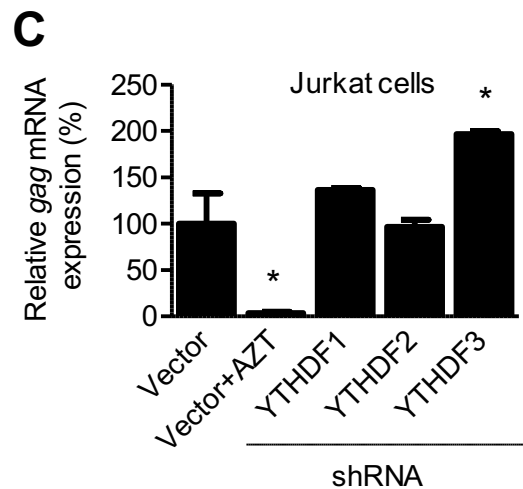

Supplement: supp [file elife-15528-supp-v1.zip › elife_poa_e15528_Figure_4_figure_supplement_1.pdf]
